# Supplementary material
Source: MDPI journal article supplement (https://www.mdpi.com/2673-4168/4/1/2)
Supplement: s1 [file s1]

Archive with 1 entries (1 files):
- obesities-2880243-supplementary.pdf
